# Supplementary material for: Risk factors analysis and nomogram development for myelosuppression in diffuse large B-cell lymphoma patients undergoing first-line chemotherapy: a dual-centre retrospective cohort study
Source: PeerJ. 2025 Jun 17;13:e19539. doi: 10.7717/peerj.19539 (PMC12180452; doi:10.7717/peerj.19539)
Supplement: Supplemental Information 2 [file peerj-13-19539-s002.xls]

## Sheet: Sheet1
Variable Name	Code	Meaning
Development Sets	1	Development Set
Development Sets	2	Verification Set
Myelosuppression	0	No
Myelosuppression	1	Yes
Sex	1	Male
Sex	2	Female
AnnArbor	1	I
AnnArbor	2	II
AnnArbor	3	III
AnnArbor	4	IV
Chemotherapy Cycle Classification	-	Categorical or ordinal, please define levels
Bone Metastasis	0	No
Bone Metastasis	1	Yes
Age	-	Continuous
60 years of age	1	No (<60)
60 years of age	2	Yes (≥60)
BMI	-	Continuous
Smoking history	0	No
Smoking history	1	Yes
Drinking history	0	No
Drinking history	1	Yes
History of surgery	0	No
History of surgery	1	Yes
Diabetes mellitus	0	No
Diabetes mellitus	1	Yes
High Blood Pressure	0	No
High Blood Pressure	1	Yes
Presence of infection	0	No
Presence of infection	1	Yes
Coronary heart disease	0	No
Coronary heart disease	1	Yes
Albumin	-	Continuous
Globulin	-	Continuous
Leukocytes	-	Continuous
Neutrophils	-	Continuous
Lymphocyte	-	Continuous
Hemoglobin	-	Continuous
Platelet	-	Continuous
Albuminous aminotransferase	-	Continuous
Aspartate aminotransferase	-	Continuous
Creatinine	-	Continuous
